# Supplementary material for: The hydrolethalus syndrome protein HYLS-1 regulates formation of the ciliary gate
Source: PubMed Central journal article supplement (PMC4992140; doi:10.1038/ncomms12437), 2016-08-18
Supplement: ncomms12437-s1.pdf [file ncomms12437-s1.pdf]

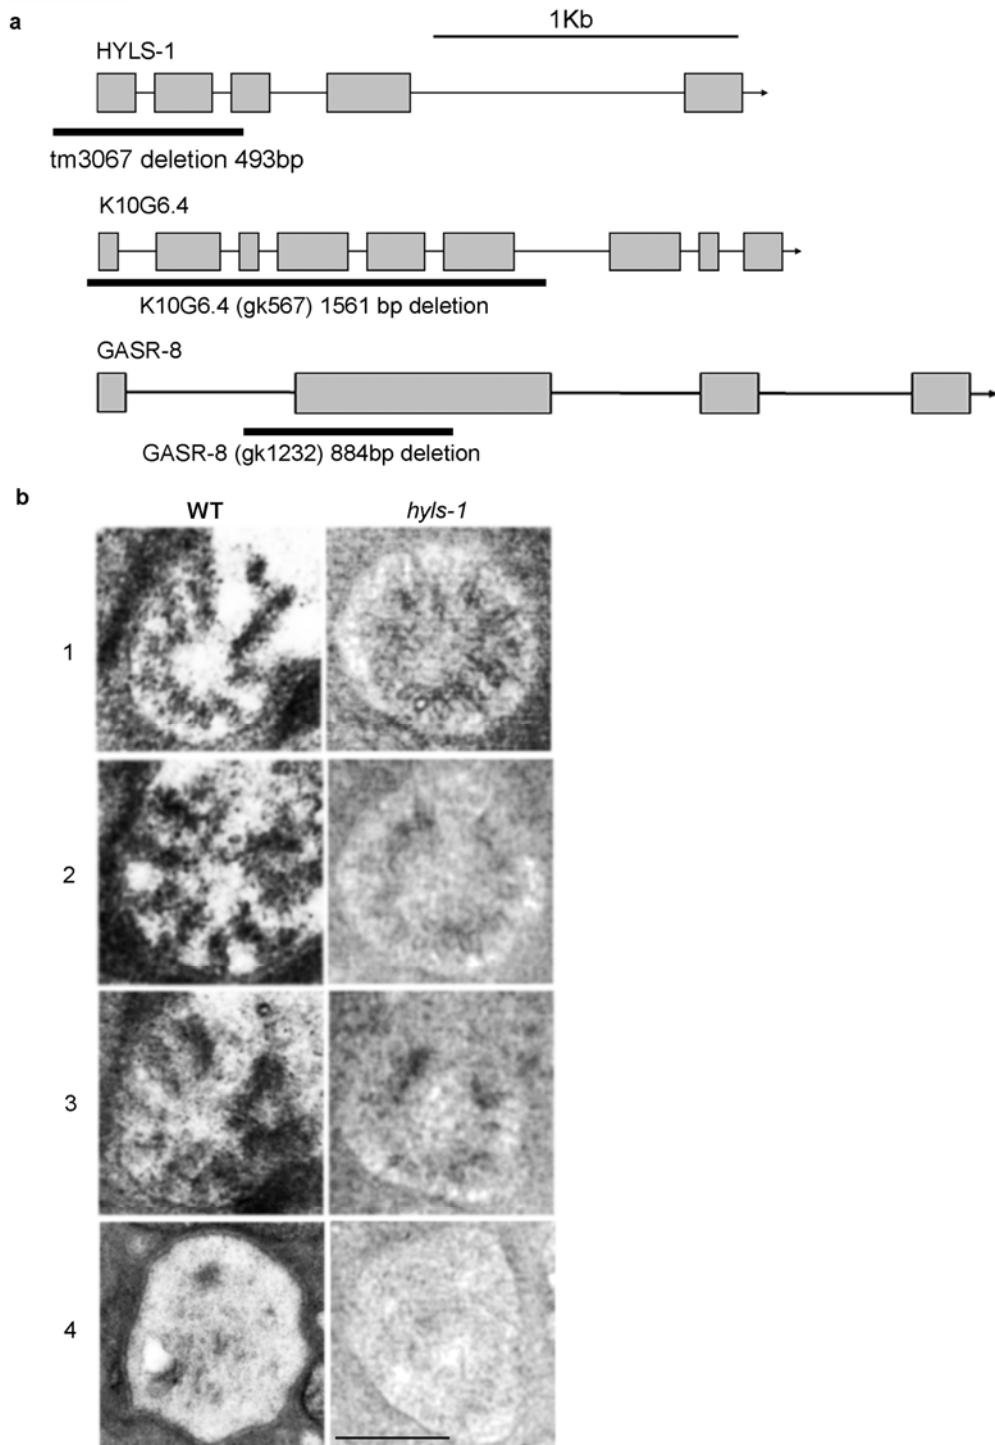

**Supplementary Figure 1. Gene schematics of *hyls-1*, *gasr-8* and *k10g6.4*, and TEM analysis of TFs in WT and *hyls-1* cilia.**

(a) Gene structure of *hyls-1*, *gasr-8* and *k10g6.4* based on WormBase (<http://wormbase.org>), indicating available mutants. The *tm3067* allele has a 493bp DNA fragment deletion, encompassing the 1<sup>st</sup>, 2<sup>nd</sup> and part of the 3<sup>rd</sup> exon of the *hyls-1* gene, removing the first 361bp of the 825bp CDS including the ATG. The *gk567* allele has a 1561bp DNA fragment deletion, encompassing exons 1 to 6 of *k10g6.4* and removing the the first 871bp of the 1380bp CDS including the ATG. The *gk1232* allele has an 884bp DNA fragment deletion, which removes exon 2 of *gasr-8* and is predicted to result in an in-frame deletion of 261aa (S28-Q288) of the 410aa wild-type protein. All three alleles are putative *null* due to the large deletion. (b) TEM analysis of TFs in WT and *hyls-1* cilia. TEM images of four consecutive serial sections (~80 nm thickness each) of the basal body region from WT or *hyls-1* mutants. Fiber-like structures in similar size can be observed in serial sections of WT cilia. In contrast, only a few areas of electron-dense material but no organized fibers remain in the basal body region of *hyls-1* mutants. Scale bar, 200 nm.

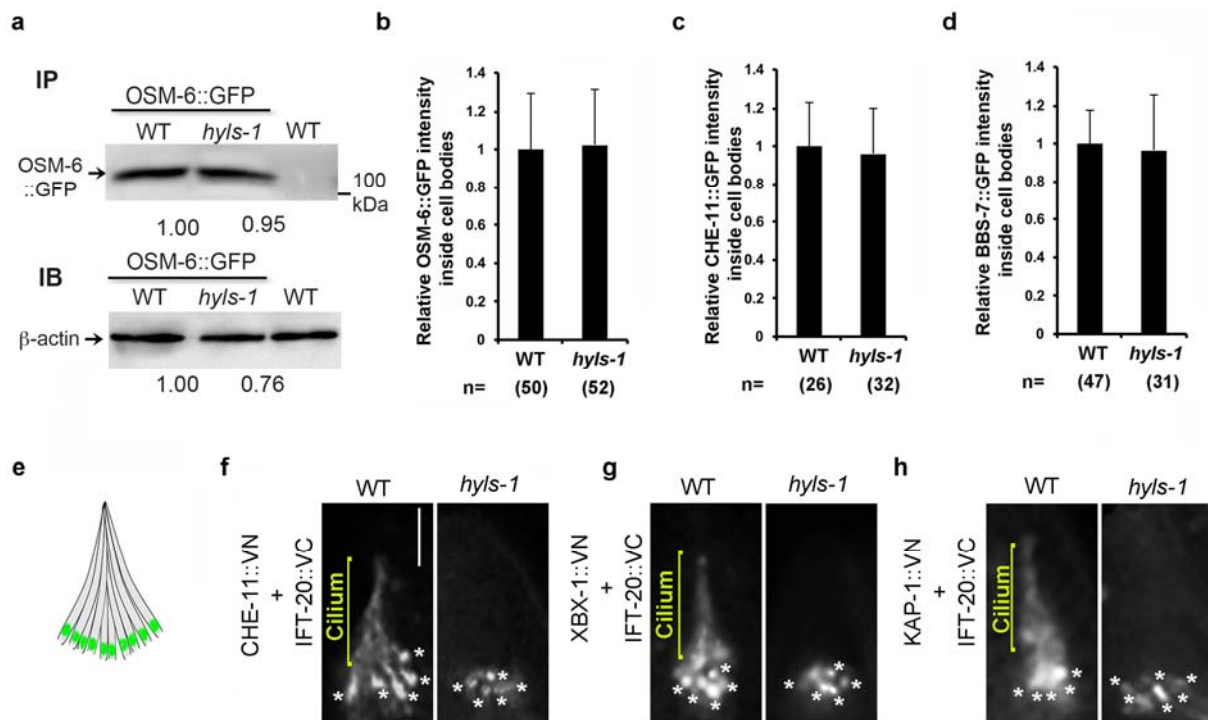

**Supplementary Figure 2. Quantitation of the expression level of IFT components, and visualization of IFT-A, IFT-B and motor association in cilia of WT and *hyls-1* mutants.** (a) Upper panel, OSM-6::GFP was immunoprecipitated from whole worm lysates with anti-GFP monoclonal antibody and then probed with anti-GFP antibody. Lower panel: whole worm lysate was probed with anti- $\beta$ -Actin (loading control). After normalization against actin levels, OSM-6::GFP shows no difference in expression level in WT and *hyls-1* mutants. (b-d) Quantitation of IFT fluorescence intensities in the cell body shows no difference in levels between WT and *hyls-1* mutants. Error bars indicate S.D. *n* represents the number of cilia analyzed. (e) Schematic of amphid sensory organ. Each amphid contains ten cilia whose distal segments bundle together. Green dots indicate ciliary base. (f-h) All BiFC pairs, CHE-11::VN + IFT-20::VC (f), XBX-1::VN + IFT-20::VC (g), and KAP-1::VN + IFT-20::VC IFT-A (h), show fluorescence complementation in both WT and *hyls-1* amphid cilia, indicating formation of functional IFT complexes. However, fluorescence complementation signal is largely restricted to the cilia base in *hyls-1* mutants. Asterisks indicate the cilia bases. Note that not all ten cilia can be visualized in one focal plane in confocal imaging. VN, N-terminus of Venus. VC, C-terminus of Venus. Scale bar, 5  $\mu$ m.

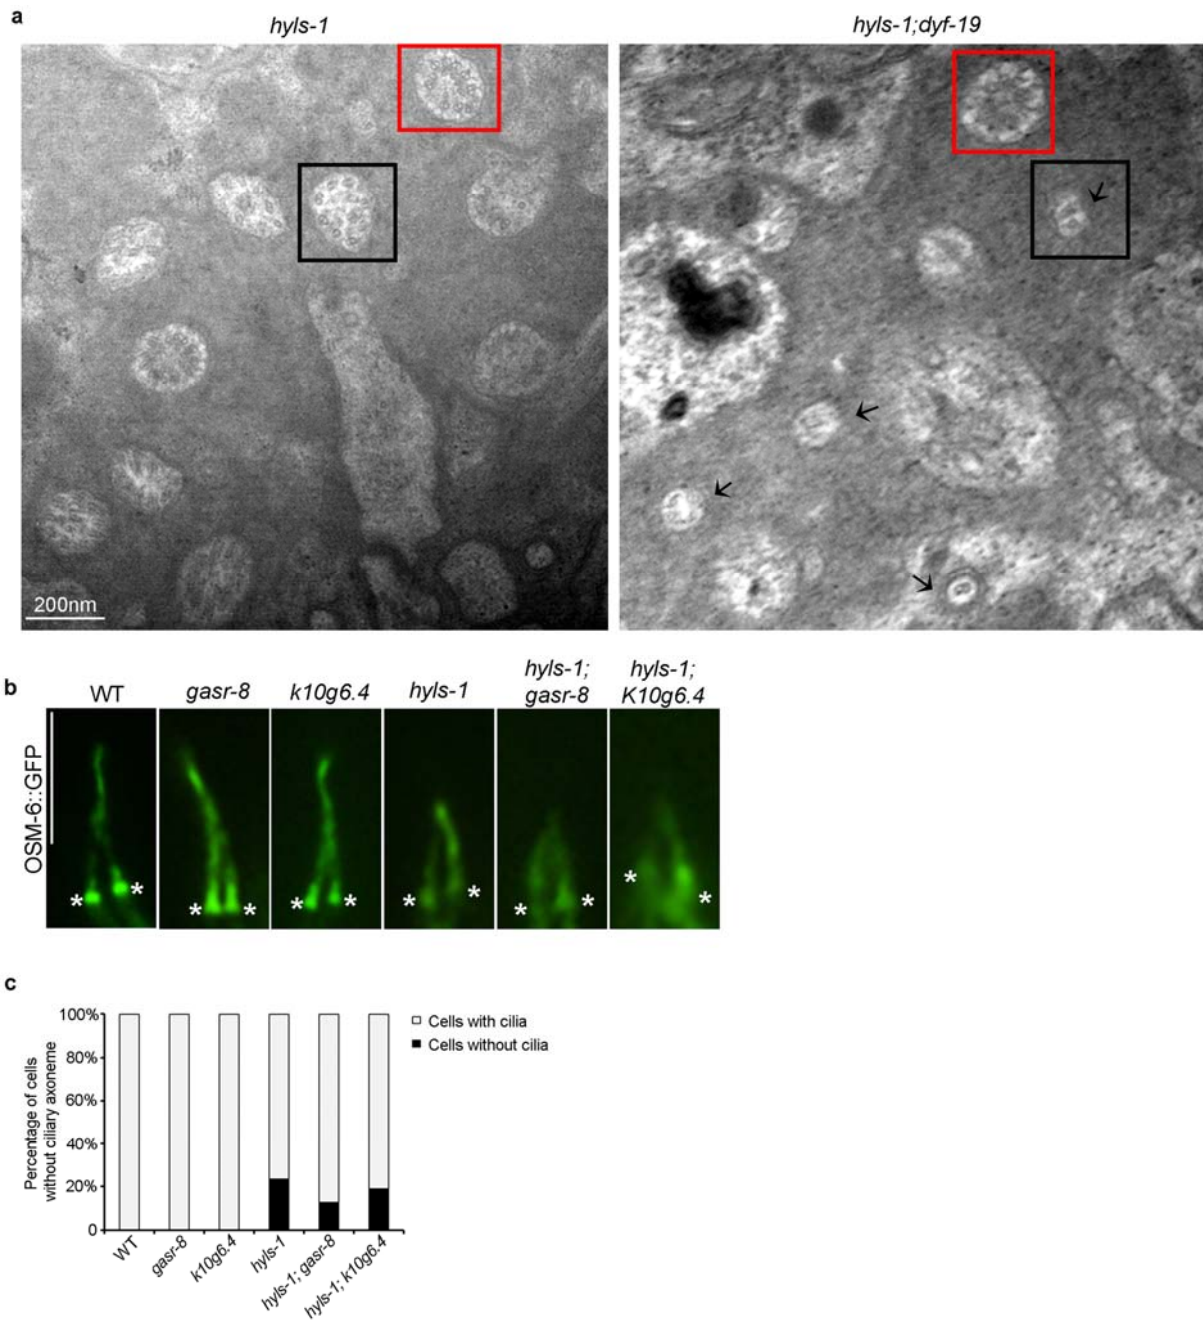

**Supplementary Figure 3. Genetic interactions between *hyls-1* and TF mutants.**

**(a)** TEM analysis of amphid sensory cilia of *hyls-1* and *hyls-1; dyf-19* double mutants. Red box indicates a cilium cut at the level of the TZ. Black box indicates axoneme immediately adjacent to the TZ. Compared to *hyls-1* single mutants, most axonemes terminate immediately distal to the TZ in *hyls-1; dyf-19* double mutants (Black arrows). Bar, 200 nm. **(b)** *hyls-1* shows no genetic interactions with *gasr-8* or *k10g6.4* in ciliogenesis. Asterisks indicate cilia base of phasmid cilia expressing the IFT marker OSM-6::GFP. Scale bar, 5  $\mu$ m. **(c)** Quantification of ciliation in phasmid neurons based on TBB-4::mCherry in different genetic backgrounds, >100 phasmid neurons analyzed for each genetic background.

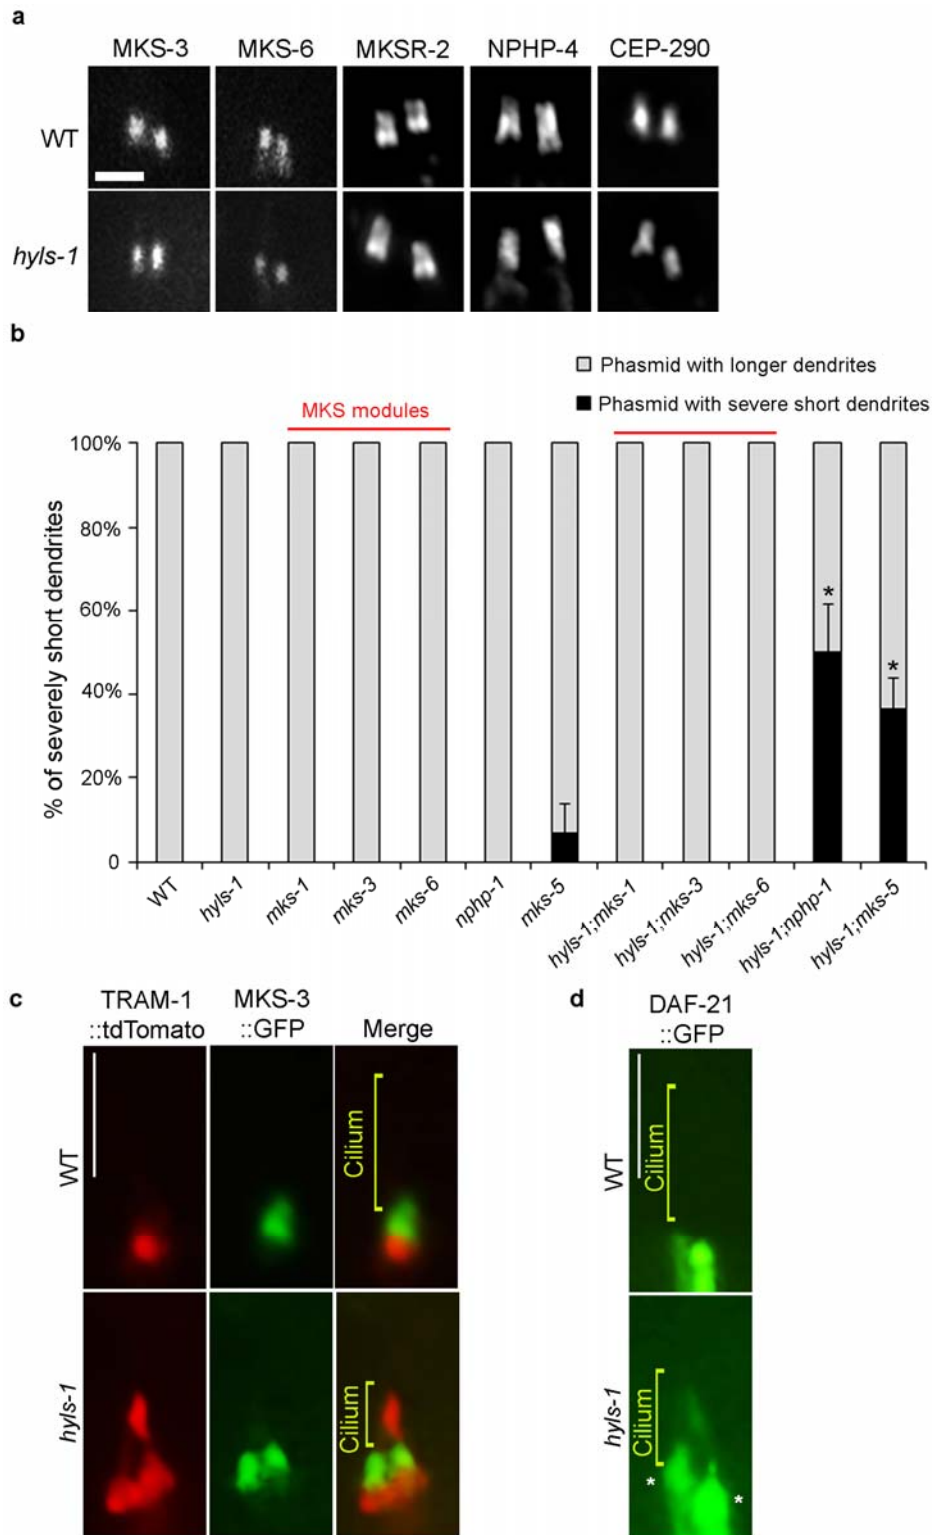

**Supplementary Figure 4. Genetic interactions between HYLS-1 and TZ proteins and compromised gating in HYLS-1-deficient cilia.**

(a) Localization of TZ components in *hyls-1* mutants. HYLS-1 is not required for proper TZ localization of MKS-3, MKS-6, MKSR-2, NPHP-4, and CCEP-290. Scale bar, 1  $\mu$ m. (b) Quantification of dendrite collapse in double mutants of *hyls-1* and various TZ genes. Severe shortened dendrites were observed in *hyls-1; nphp-1* and *hyls-1; mks-5* double mutants. No genetic interaction was observed between *hyls-1* and MKS module mutants (*mks-1*, *mks-3* or *mks-6*). > 100 phasmid neurons analyzed for each genetic background. Error bars indicate S.D. Student's t-test for significant differences, \*  $P < 0.001$ . (c) tdTomato-tagged non-ciliary membrane protein TRAM-1 leaks into phasmid cilia in *hyls-1* mutants. GFP-tagged MKS-3 was used as a marker to label the TZ. Scale bar, 5  $\mu$ m. (d) Non-ciliary cytoplasmic protein DAF-21 leaks into phasmid cilia in *hyls-1* mutants. Scale bar, 5  $\mu$ m.

**Supplementary Table 1. Quantitative Analysis of Transition Fibers (TFs) and Transition Zone (TZ) in serial section TEM study.**

|    | WT                                           | <i>hyls-1</i> | <i>dyf-19</i> | <i>hyls-1;</i><br><i>dyf-19</i> |      |
|----|----------------------------------------------|---------------|---------------|---------------------------------|------|
|    | Number of cilia examined                     | 19            | 16            | 8                               | 14   |
| TF | Number of TFs with fiber-like structures     | 19            | 2 (*)         | 8                               | 0    |
|    | Percentage of TFs with fiber-like structures | 100%          | 12.5% (*)     | 100%                            | 0    |
| TZ | Number of TZ with Y-links                    | 10            | 16            | 8                               | 14   |
|    | Percentage of TZ with Y-links                | 100%          | 100%          | 100%                            | 100% |

\*: the fiber-like structure observed in *hyls-1* mutants is not intact.

**Supplementary Table 2. *C. elegans* strains used in this study**

| Strain name | Genotype                                           |
|-------------|----------------------------------------------------|
| OD192       | <i>hlys-1(tm3067)V</i>                             |
| ZP541       | <i>dyf-19(jhu455)V</i>                             |
| VC2343      | <i>gasr-8 (gk1232)V</i>                            |
| VC1268      | <i>k10g6.4 (gk567)II</i>                           |
| FX2705      | <i>mks-1 (tm2705)III</i>                           |
| FX2547      | <i>mks-3 (tm2547)II</i>                            |
| FX3100      | <i>mks-5 (tm3100)II</i>                            |
| RB743       | <i>nphp-1(ok500)II</i>                             |
| VC1466      | <i>mks-6(gk674)I</i>                               |
| ZP2174      | <i>mks-1 (tm2705)III; hlys-1(tm3067)V; IsOSM6</i>  |
| ZP2175      | <i>mks-6(gk674)I; hlys-1(tm3067)V; IsOSM6</i>      |
| ZP2176      | <i>nphp-1(ok500)II; hlys-1(tm3067)V; IsOSM6</i>    |
| ZP2177      | <i>gasr-8 (gk1232)V; hlys-1(tm3067)V; IsOSM6</i>   |
| ZP2203      | <i>dyf-19(jhu455)V; hlys-1(tm3067)V; IsOSM-6</i>   |
| ZP2204      | <i>k10g6.4 (gk567)II; hlys-1(tm3067)V; IsOSM-6</i> |
| ZP2205      | <i>mks-5 (tm3100)II; hlys-1(tm3067)V; IsOSM-6</i>  |
| ZP2179      | <i>mks-3 (tm2547)II ; hlys-1(tm3067)V; IsOSM6</i>  |
| ZP1389      | <i>jhuEx [HYLS1::GFP+DYF-9::mCherry+pRF4]</i>      |
| ZP1993      | <i>jhuEx [FBF1::mCherry+GASR-8::GFP+pRF4]</i>      |
| ZP1997      | <i>jhuEx [NPHP1::GFP+GASR-8::mCherry+pRF4]</i>     |
| ZP2001      | <i>jhuEx [NPHP1::GFP+FBF1::mCherry+pRF4]</i>       |
| ZP1880      | <i>jhuEx [K10G6.4::GFP+DYF-9::mCherry+pRF4]</i>    |
| SP2101      | <i>mnIs17 [OSM6::GFP]</i>                          |
| ZP1986      | <i>hlys-1(tm3067)V; IsOSM-6</i>                    |
| ZP2035      | <i>hlys-1(tm3067)V; Ex [CHE-11::GFP+pRF4]</i>      |
| PT50        | <i>che-11(e1810)V; Ex [CHE-11::GFP+pRF4]</i>       |
| ZP1205      | <i>jhuEx [BBS-7::GFP +pRF4]</i>                    |
| ZP1397      | <i>jhuEx [BBS-7::GFP+MKS-5::mCherry+pRF4]</i>      |

ZP2156 *hyls-1(tm3067)V; jhuEx [BBS-7::GFP +pRF4]*  
ZP2180 *hyls-1(tm3067)V; jhuEx [BBS-7::GFP+MKS-5::mCherry+pRF4]*  
YH490 *yhEx [MKS-1::YFP+CHE-13::CFP+pRF4]*  
YH751 *yhEx [MKS-6::GFP+XBX-1::tdTomao+pRF4]*  
YH652 *yhEx [GFP::MKS-3+XBX-1::tdTomato+pRF4]*  
ZP2024 *hyls-1(tm3067)V; jhuEx [TBB-4::mCherry+DYF-19::GFP+pRF4]*  
ZP2025 *hyls-1(tm3067)V; yhEx [GFP::MKS-3+XBX-1::tdTomato+pRF4]*  
ZP2026 *hyls-1(tm3067)V; yhEx [MKS-1::YFP+CHE-13::CFP+pRF4]*  
ZP2027 *jhuEx [TBB-4::mCherry+DYF-19::GFP+pRF4]*  
ZP2032 *hyls-1(tm3067)V; jhuEx [NPHP1::GFP+FBF1::mCherry+pRF4]*  
ZP2033 *hyls-1(tm3067)V; jhuEx [NPHP1::GFP+Gasr-8::mCherry+pRF4]*  
ZP1855 *hyls-1(tm3067)V; jhuEx [RPI-2::GFP+MKS-5::mCherry+pRF4]*  
ZP1170 *jhuEx [CHE-11::Venus1-173+IFT-20::Venus155-238+pRF4]*  
ZP1346 *hyls-1(tm3067)V; jhuEx [CHE-11::Venus1-173+IFT-20::Venus155-238+pRF4]*  
ZP2291 *jhuEx [XBX-1::Venus1-173+IFT-20::Venus155-238+pRF4]*  
ZP2299 *hyls-1(tm3067)V; jhuEx [XBX-1::Venus1-173+IFT-20::Venus155-238+pRF4]*  
ZP2290 *jhuEx [KAP-1::Venus1-173+IFT-20::Venus155-238+pRF4]*  
ZP2292 *hyls-1(tm3067)V; jhuEx [KAP-1::Venus1-173+IFT-20::Venus155-238+pRF4]*  
ZP2293 *jhuEx [OSM-3::Venus1-173+IFT-20::Venus155-238+pRF4]*  
ZP2294 *hyls-1(tm3067)V; jhuEx [OSM-3::Venus1-173+IFT-20::Venus155-238+pRF4]*  
ZP2285 *jhuEx [F29G9.2::GFP+MKS-5::mCherry+pRF4]*  
ZP2287 *hyls-1(tm3067)V; jhuEx [F29G9.2::GFP+MKS-5::mCherry+pRF4]*  
YH670 *yhEx [TRAM-1::tdTomato+MKS-3::GFP+pRF4]*  
ZP2297 *hyls-1(tm3067)V; yhEx [TRAM-1::tdTomato+MKS-3::GFP+pRF4]*  
ZP2056 *jhuEx [Posm-9::OSM-9::GFP+pRF4]*  
ZP2296 *hyls-1(tm3067)V; jhuEx [Posm-9::OSM-9::GFP+pRF4]*  
ZP2289 *jhuEx [Parl-13::DAF-21::GFP+pRF4]*  
ZP2298 *hyls-1(tm3067)V; jhuEx [Parl-13::DAF-21::GFP+pRF4]*  
DAM278 *vieSi12[GFP::CCEP-290; cb unc-119(+)]*  
DAM323 *vieSi22[GFP::MKS-2; cb unc-119(+)]*  
DAM324 *vieSi23[GFP::NPHP-4; cb unc-119(+)]*

---
